# Supplementary material
Source: PubMed Central journal article supplement (PMC4538545)
Supplement: AAC.04543-14_zac009154279so1.pdf [file AAC.04543-14_zac009154279so1.pdf]

**Table S1: PCR and sequencing primers used in this study**

| genetic structure            | primer name | primer sequence (5'-3')  | Amplicon (bp) | Ref |
|------------------------------|-------------|--------------------------|---------------|-----|
| <i>bla</i> <sub>CTX-M</sub>  | CTX-MU1     | ATGTGCAGYACCAGTAARGT     | 593           | 13  |
|                              | CTX-MU2     | TGGGTRAARTARGTSACCAGA    |               |     |
| <i>bla</i> <sub>SHV</sub>    | SHV-F       | GCCCGGGTTATTCTTATTTGTCGC | 1016          | 13  |
|                              | SHV-R       | TCTTTCCGATGCCGCCGCCAGTCA |               |     |
| <i>bla</i> <sub>TEM</sub>    | TEM-F       | ATGAGTATTCAACATTTCCG     | 861           | 13  |
|                              | TEM-R       | TTACCAATGCTTAATCAGTGAG   |               |     |
| <i>bla</i> <sub>OXA-9</sub>  | OXA-9 Fw    | CGTCGCTCACCATATCTCCC     | 315           | 14  |
|                              | OXA-9 Rv    | CCTCTCGTGCTTTAGACCCG     |               |     |
| <i>bla</i> <sub>IMP</sub>    | IMP-F       | GGAATAGAGTGGCTTAAYTC     | 232           | 15  |
|                              | IMP-R       | TCGGTTTAAAYAAAACAACCACC  |               |     |
| <i>bla</i> <sub>VIM</sub>    | VIM-F       | GATGGTGTGTTGGTCGCATA     | 390           | 15  |
|                              | VIM-R       | CGAATGCGCAGCACCAG        |               |     |
| <i>bla</i> <sub>NDM</sub>    | NDM-F       | GGTTTGGCGATCTGGTTTTTC    | 621           | 16  |
|                              | NDM-R       | CGGAATGGCTCATCACGATC     |               |     |
| <i>bla</i> <sub>OXA-48</sub> | OXA-48-F    | GCGTGGTTAAGGATGAACAC     | 438           | 16  |
|                              | OXA-48-R    | CATCAAGTTCAACCCAACCG     |               |     |
| <i>bla</i> <sub>KPC</sub>    | KPC F       | CGTCTAGTTCTGCTGTCTTG     | 798           | 16  |
|                              | KPC-R       | CTTGTCATCCTTGTTAGGCG     |               |     |
| internal probe               | KPC For     | CTTGCTGCCGCTGTGCTG       | 450           | 20  |
|                              | KPC-Rev     | CTTGTCATCCTTGTTAGGCG     |               |     |
| whole gene                   | KPC1F       | GCTACACCTAGCTCCACCTTC    | 950           | 17  |
|                              | KPC1R       | ACAGTGGTTGGTAATCCATGC    |               |     |

|                                       |       |                      |  |    |
|---------------------------------------|-------|----------------------|--|----|
| upstream<br><i>bla</i> <sub>KPC</sub> | 3098U | TGACCCTGAGCGGCGAAAGC |  | 11 |
|---------------------------------------|-------|----------------------|--|----|

---

outward Tn4401 region

---

|                 |          |                       |      |       |
|-----------------|----------|-----------------------|------|-------|
| outward primers | EcoRIout | CACCCGACCTGGACGAACTA  |      |       |
|                 | 141R-6   | TCACCGGCCCTCACCTTTGG  | 2700 | 11    |
| sequencing by   | Bu13-1   | CGTCCTGCTGCTCATTCA    |      | This  |
| primer walking  | Bu13-2   | ATGTTATGGCTAACTCTAGGA |      | study |

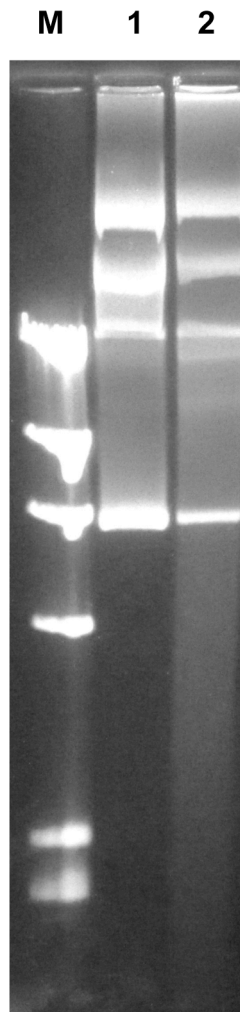

**Fig. S1. Plasmid DNA from *E. coli* JM101 transformants.**

Separation on 1 % agarose gel of plasmid extracts from JM101 transformed with the entire plasmid content of Kbu-1 (lane 1) and with the 13 kb band alone (lane 2). Lane M: Molecular Weight marker II (Roche).
